# Supplementary material
Source: PubMed Central journal article supplement (PMC6450288)
Supplement: jamapsychiatry-76-399-s001.pdf [file jamapsychiatry-76-399-s001.pdf]

## Supplementary Online Content

Choi KW, Chen C-Y, Stein MB, et al; Major Depressive Disorder Working Group of the Psychiatric Genomics Consortium. Assessment of bidirectional relationships between physical activity and depression among adults: a 2-sample Mendelian randomization study. *JAMA Psychiatry*. Published online January 23, 2019. doi:10.1001/jamapsychiatry.2018.4175

- eTable 1.** Top SNPs (n = 10) for Accelerometer-Based Activity ( $P < 1 \times 10^{-7}$ )
- eTable 2.** Genome-Wide Reported SNPs (n = 2) for Accelerometer-Based Activity
- eTable 3.** Top SNPs (n = 25) for Self-Reported Activity ( $P < 1 \times 10^{-7}$ )
- eTable 4.** Genome-Wide Reported SNPs (n = 8) for Self-Reported Physical Activity
- eTable 5.** Top SNPs (n = 17) for Depression ( $P < 1 \times 10^{-6}$ )
- eTable 6.** Mendelian Randomization Results of Accelerometer-Based Activity (Genome-Wide SNPs Only) → Depression
- eTable 7.** Instruments SNPs, dbSNP Genes, and GWAS-Linked Traits
- eTable 8.** Mendelian Randomization Results for Sensitivity Analysis
- eTable 9.** Mendelian Randomization Results of Self-Reported Activity (Top SNPs  $P < 1 \times 10^{-7}$ ) → Depression
- eTable 10.** Mendelian Randomization Results of Self-Reported Activity (Top SNPs  $P < 1 \times 10^{-7}$ ) → Depression, Further Excluding APOE SNP
- eTable 11.** Mendelian Randomization Results of Self-Reported Activity (Genome-Wide SNPs Only) → Depression
- eTable 12.** Mendelian Randomization Results of Depression (Top SNPs  $P < 1 \times 10^{-6}$ ) → Self-Reported Activity
- eTable 13.** Contextualizing 1-SD Increase in Objectively Measured Physical Activity
- eFigure 1.** Mendelian Randomization Plots for Accelerometer-Based Activity (Genome-Wide SNPs Only) → Depression
- eFigure 2.** Leave-One-Out Analyses for SNPs Associated With Accelerometer-Based Activity (PA, Top SNPs  $P < 1 \times 10^{-7}$ ) → Depression
- eFigure 3.** Mendelian Randomization Plots for Accelerometer-Based Activity (Sensitivity Analysis) → Depression
- eFigure 4.** Mendelian Randomization Plots for Self-Reported Activity (Top SNPs  $P < 1 \times 10^{-7}$ ) → Depression
- eFigure 5.** Mendelian Randomization Plots for Self-Reported Activity (Genome-Wide SNPs Only) → Depression
- eFigure 6.** Mendelian Randomization Plots for Depression (Top SNPs  $P < 1 \times 10^{-6}$ ) → Self-Reported Activity
- eFigure 7.** Contextualizing 1-SD Increase in Objectively Measured Physical Activity
- eMethods 1.** Further Sensitivity Analyses for Main Result With 10 Accelerometer-Based SNPs
- eMethods 2.** MR Power Calculations

This supplementary material has been provided by the authors to give readers additional information about their work.

**eTable 1. Top SNPs (n = 10) for Accelerometer-Based Activity ( $P < 1 \times 10^{-7}$ )**

| SNP ID      | Proxy SNP   | $r^2$ for proxy | Effect allele (alternative) | $\beta$ (Standard Error) for PA | $\beta$ (Standard Error) for MDD |
|-------------|-------------|-----------------|-----------------------------|---------------------------------|----------------------------------|
| rs59499656  | -           | -               | A (T) <sup>†</sup>          | -0.228 (0.038)                  | -0.003 (0.009)                   |
| rs11012732  | -           | -               | A (G)                       | 0.225 (0.039)                   | -0.008 (0.01)                    |
| rs12045968  | -           | -               | T (G)                       | -0.239 (0.044)                  | 0.01 (0.011)                     |
| rs12522261  | -           | -               | G (A)                       | 0.211 (0.038)                   | -0.004 (0.009)                   |
| rs148193266 | -           | -               | A (C)                       | -0.51 (0.092)                   | 0.035 (0.021)                    |
| rs56194509  | rs113871181 | 1.0             | G (A)                       | -0.291 (0.044)                  | -0.005 (0.011)                   |
| rs1550435   | -           | -               | T (C)                       | 0.2 (0.037)                     | -0.012 (0.009)                   |
| rs34517439  | -           | -               | C (A)                       | 0.308 (0.056)                   | -0.022 (0.015)                   |
| rs6775319   | -           | -               | A (T) <sup>†</sup>          | 0.225 (0.041)                   | -0.018 (0.01)                    |
| rs9293503   | -           | -               | T (C)                       | 0.329 (0.059)                   | -0.019 (0.014)                   |

PA = physical activity. MDD = major depressive disorder.

<sup>†</sup>Strand ambiguous SNP; forward strand inferred based on allele frequency information.

*Note.* All SNPs with  $p < 1 \times 10^{-7}$  (2,200) clumped at  $r^2 < .001$  into 10 top SNPs. Proxy SNPs reported where the index SNP was not found in the outcome (MDD) summary statistics. Details about proxy SNP search strategy are reported in the manuscript. Alleles and betas reported for proxy SNPs.

**eTable 2. Genome-Wide Reported SNPs (n = 2) for Accelerometer-Based Activity**

| SNP ID     | Proxy SNP   | $r^2$ for proxy | Effect allele (alternative) | $\beta$ (Standard Error) for PA | $\beta$ (Standard Error) for MDD |
|------------|-------------|-----------------|-----------------------------|---------------------------------|----------------------------------|
| rs59499656 | -           | -               | A (T) <sup>†</sup>          | -0.228 (0.038)                  | -0.003 (0.009)                   |
| rs55657917 | rs113871181 | 1.0             | G (A)                       | -0.291 (0.044)                  | -0.005 (0.011)                   |

PA = physical activity. MDD = major depressive disorder.

<sup>†</sup>Strand ambiguous SNP; forward strand inferred based on allele frequency information.

Note. Proxy SNPs and effects reported where the index SNP was not found in the outcome (MDD) summary statistics. Details about proxy SNP search strategy are reported in the manuscript. Alleles and betas reported for proxy SNPs.

**eTable 3. Top SNPs (n = 25) for Self-Reported Activity ( $P < 1 \times 10^{-7}$ )**

| SNP ID      | Proxy SNP | $r^2$ for proxy | Effect allele (alternative) | $\beta$ (Standard Error) for PA | $\beta$ (Standard Error) for MDD |
|-------------|-----------|-----------------|-----------------------------|---------------------------------|----------------------------------|
| rs10145335  | -         | -               | G (A)                       | -0.014 (0.003)                  | -0.008 (0.01)                    |
| rs10157145  | -         | -               | T (C)                       | -0.012 (0.002)                  | -0.012 (0.009)                   |
| rs1043595   | -         | -               | G (A)                       | 0.014 (0.002)                   | -0.003 (0.01)                    |
| rs114243593 | -         | -               | A (G)                       | 0.027 (0.005)                   | 0.021 (0.024)                    |
| rs1186721   | -         | -               | G (A)                       | -0.013 (0.002)                  | -0.008 (0.01)                    |
| rs12912808  | -         | -               | C (T)                       | 0.018 (0.003)                   | 0.017 (0.013)                    |
| rs1921981   | -         | -               | G (A)                       | 0.013 (0.002)                   | -0.007 (0.01)                    |
| rs1972763   | -         | -               | C (T)                       | 0.013 (0.002)                   | 0.009 (0.009)                    |
| rs1974771   | -         | -               | G (A)                       | -0.021 (0.004)                  | 0.008 (0.014)                    |
| rs2035562   | -         | -               | A (G)                       | -0.014 (0.002)                  | 0.016 (0.01)                     |
| rs2114286   | -         | -               | A (G)                       | -0.012 (0.002)                  | -0.021 (0.009)                   |
| rs2494664   | -         | -               | A (G)                       | -0.012 (0.002)                  | -0.017 (0.009)                   |
| rs2854277   | -         | -               | C (T)                       | 0.032 (0.005)                   | 0.04 (0.014)                     |
| rs2942127   | -         | -               | G (A)                       | 0.016 (0.003)                   | 0.006 (0.011)                    |
| rs2988004   | -         | -               | T (G)                       | -0.013 (0.002)                  | 0.013 (0.009)                    |
| rs429358    | -         | -               | T (C)                       | -0.022 (0.003)                  | 0.037 (0.015)                    |
| rs4886868   | -         | -               | T (G)                       | -0.012 (0.002)                  | 0.005 (0.01)                     |
| rs527737    | -         | -               | C (T)                       | -0.012 (0.002)                  | -0.012 (0.009)                   |
| rs56293069  | -         | -               | G (C) <sup>†</sup>          | 0.014 (0.003)                   | -0.022 (0.01)                    |
| rs67432617  | -         | -               | A (C)                       | 0.015 (0.003)                   | -0.006 (0.011)                   |
| rs7326482   | -         | -               | G (T)                       | -0.013 (0.002)                  | 0.028 (0.009)                    |

|            |   |   |       |                |               |
|------------|---|---|-------|----------------|---------------|
| rs77742115 | - | - | T (C) | -0.018 (0.003) | 0.002 (0.012) |
| rs7804463  | - | - | T (C) | 0.015 (0.002)  | 0.021 (0.009) |
| rs877483   | - | - | T (C) | 0.012 (0.002)  | 0.005 (0.009) |
| rs921915   | - | - | T (C) | -0.014 (0.002) | 0.002 (0.009) |

PA = physical activity. MDD = major depressive disorder.

† Strand ambiguous SNP; forward strand inferred based on allele frequency information.

Note. All SNPs with  $p < 1 \times 10^{-7}$  (1,699) clumped at  $r^2 < .001$  into 25 top SNPs.

**eTable 4. Genome-Wide Reported SNPs (n = 8) for Self-Reported Physical Activity**

| SNP ID    | Proxy SNP | $r^2$ for proxy | Effect allele (alternative) | $\beta$ (Standard Error) for PA | $\beta$ (Standard Error) for MDD |
|-----------|-----------|-----------------|-----------------------------|---------------------------------|----------------------------------|
| rs1043595 | -         | -               | G (A)                       | 0.014 (0.002)                   | -0.003 (0.01)                    |
| rs149943  | -         | -               | G (A)                       | 0.019 (0.003)                   | 0.057 (0.014)                    |
| rs2035562 | -         | -               | A (G)                       | -0.014 (0.002)                  | 0.016 (0.01)                     |
| rs2854277 | -         | -               | C (T)                       | 0.032 (0.005)                   | 0.04 (0.014)                     |
| rs2988004 | -         | -               | T (G)                       | -0.013 (0.002)                  | 0.013 (0.009)                    |
| rs429358  | -         | -               | T (C)                       | -0.022 (0.003)                  | 0.037 (0.015)                    |
| rs7791992 | -         | -               | C (A)                       | -0.014 (0.002)                  | 0.001 (0.009)                    |
| rs7804463 | -         | -               | T (C)                       | 0.015 (0.002)                   | 0.021 (0.009)                    |
| rs3094622 | N/A       | N/A             | -                           | -                               | -                                |

PA = physical activity. MDD = major depressive disorder.

Note. Proxy SNPs and effects reported where the index SNP was not found in the outcome (MDD) summary statistics. Details about proxy SNP search strategy are reported in the manuscript. Alleles and betas reported for proxy SNPs.

**eTable 5. Top SNPs (n = 17) for Depression ( $P < 1 \times 10^{-6}$ )**

| SNP ID     | Proxy SNP  | $r^2$ for proxy | Effect allele (alternative) | $\beta$ (Standard Error) for MDD | $\beta$ (Standard Error) for self-reported PA | $\beta$ (Standard Error) for accelerometer-based PA |
|------------|------------|-----------------|-----------------------------|----------------------------------|-----------------------------------------------|-----------------------------------------------------|
| rs1025145  | -          | -               | A (G)                       | -0.047 (0.009)                   | -0.005 (0.002)                                | 0.054 (0.038)                                       |
| rs1081458  | -          | -               | A (T) <sup>†</sup>          | 0.06 (0.012)                     | -0.002 (0.003)                                | -0.023 (0.048)                                      |
| rs1460943  | -          | -               | T (C)                       | 0.048 (0.009)                    | 0.003 (0.002)                                 | 0.031 (0.037)                                       |
| rs17499892 | -          | -               | A (C)                       | -0.05 (0.009)                    | -0.001 (0.002)                                | -0.011 (0.037)                                      |
| rs1936365  | -          | -               | C (G) <sup>†</sup>          | -0.068 (0.013)                   | -0.017 (0.003)                                | 0.085 (0.049)                                       |
| rs1950829  | -          | -               | A (G)                       | 0.054 (0.009)                    | -0.003 (0.002)                                | -0.023 (0.036)                                      |
| rs2060886  | -          | -               | T (C)                       | -0.045 (0.009)                   | -0.006 (0.002)                                | -0.056 (0.037)                                      |
| rs2451828  | -          | -               | T (C)                       | 0.158 (0.031)                    | 0.009 (0.007)                                 | 0.099 (0.123)                                       |
| rs34382743 | -          | -               | T (C)                       | 0.045 (0.009)                    | 0.0004 (0.002)                                | 0.021 (0.037)                                       |
| rs76025409 | rs12658032 | 0.91            | A (G)                       | 0.054 (0.009)                    | -0.009 (0.002)                                | -0.034 (0.038)                                      |
| rs4776768  | -          | -               | T (C)                       | -0.05 (0.01)                     | -0.001 (0.002)                                | 0.003 (0.04)                                        |
| rs4811079  | -          | -               | C (G) <sup>†</sup>          | 0.048 (0.009)                    | 0.002 (0.002)                                 | 0.046 (0.038)                                       |
| rs586275   | -          | -               | A (G)                       | -0.06 (0.012)                    | 0.001 (0.003)                                 | 0.006 (0.044)                                       |
| rs6832890  | -          | -               | C (G) <sup>†</sup>          | -0.061 (0.011)                   | 0.0004 (0.003)                                | -0.017 (0.046)                                      |
| rs7546987  | -          | -               | T (C)                       | -0.045 (0.009)                   | -0.001 (0.002)                                | 0.06 (0.037)                                        |
| rs78676209 | -          | -               | C (G) <sup>†</sup>          | -0.102 (0.02)                    | 0.004 (0.005)                                 | -0.242 (0.086)                                      |
| rs10825942 | N/A        | N/A             | -                           | -                                | -                                             | -                                                   |

MDD = major depressive disorder. PA = physical activity.

<sup>†</sup>Strand ambiguous SNP; forward strand inferred based on allele frequency information.

*Note.* All SNPs with  $p < 1 \times 10^{-6}$  (584) clumped at  $r^2 < .001$  into 17 top SNPs. At  $p < 1 \times 10^{-7}$ , 79 SNPs clumped into only 5 top SNPs, hence we chose the former relaxed threshold of  $p < 1 \times 10^{-6}$ . Proxy SNPs and effects reported where the index SNP was not found in the outcome (PA) summary statistics. Details about proxy SNP search strategy are reported in the manuscript. Alleles and betas reported for proxy SNPs.

**eTable 6. Mendelian Randomization Results of Accelerometer-Based Activity (Genome-Wide SNPs Only) → Depression**

| Method                    | Odds ratio | 95% CI     | P Value | SNPs |
|---------------------------|------------|------------|---------|------|
| Inverse-variance weighted | 1.12       | 0.72, 1.75 | .60     | 2    |

Odds ratio = odds for MDD per 1 standard deviation increase in average acceleration. *Note.* No other analysis conducted due to limited SNPs.

**eFigure 1. Mendelian Randomization Plots for Accelerometer-Based Activity (Genome-Wide SNPs Only) → Depression**

(a) Scatterplot of SNP effects on physical activity (PA) versus their effects on depression (MDD), with slope of line corresponding to the estimated MR effect.

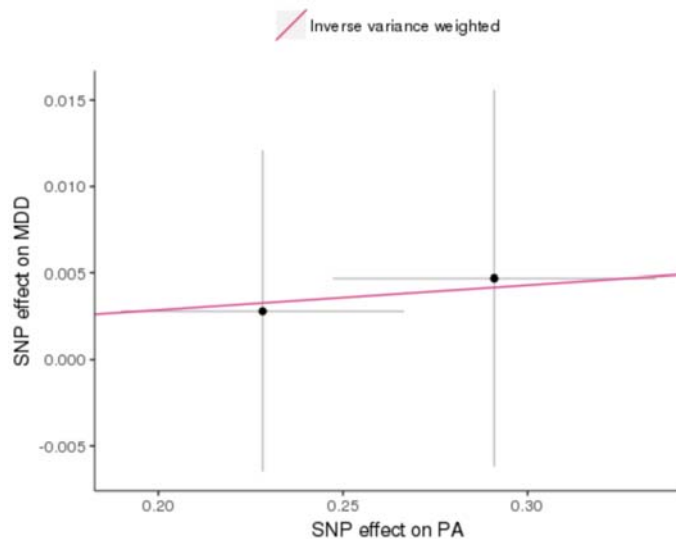

**eFigure 2. Leave-One-Out Analyses for SNPs Associated With Accelerometer-Based Activity (PA, Top SNPs  $P < 1 \times 10^{-7}$ ) → Depression**

Reported in Table 1. Removal of any single instrument SNP does not appear to change the significance of the overall MR estimate.

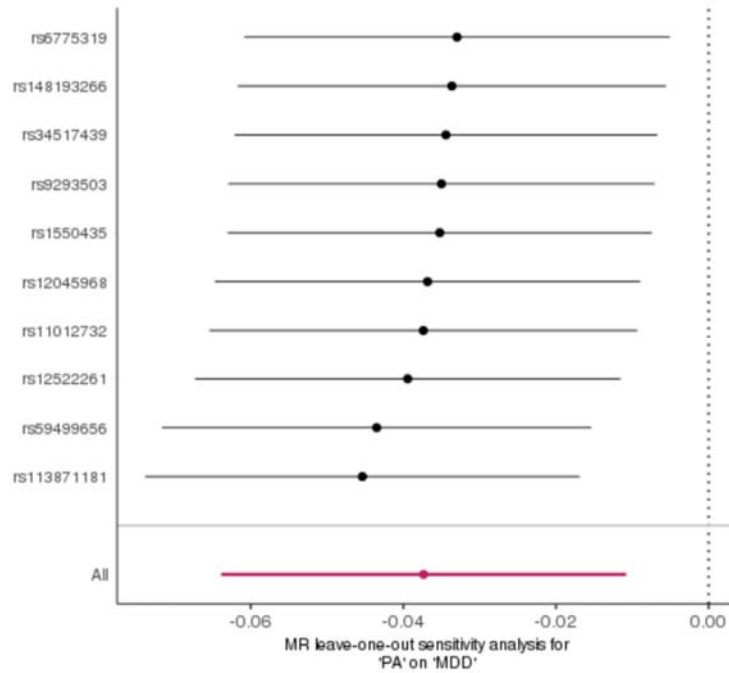

## eMethods 1. Further Sensitivity Analyses for Main Result With 10 Accelerometer-Based SNPs

In addition to looking up individual SNPs in GWAS databases for nominal associations with depression-relevant traits (see main manuscript), we mapped the 10 instrument SNPs for accelerometer-based physical activity to known genes (via the dbSNP database: <https://www.ncbi.nlm.nih.gov/snp>), as available, and examined if any of these genes have been associated with depression-relevant traits in the up-to-date online GWAS Catalog (<https://www.ebi.ac.uk/gwas>), as summarized in eTable 7. We conducted a more stringent sensitivity analysis in which we only included instrument SNPs that were not mapped to any genes that have been linked to potentially relevant traits such as IQ, neuroticism, or BMI. Importantly, we found the pattern of MR results remained substantively unchanged, as shown in eTable 8 and Figure 3.

**eTable 7. Instruments SNPs, dbSNP Genes, and GWAS-Linked Traits**

| SNP          | dbSNP gene      | GWAS catalog traits linked to this gene          |
|--------------|-----------------|--------------------------------------------------|
| rs59499656*  | N/A             | N/A, but was associated with BMI in PhenoScanner |
| rs11012732   | MLLT10          | Cancer                                           |
| rs12045968   | N/A             | N/A                                              |
| rs12522261*  | LINC01470       | Wellbeing; depression                            |
| rs148193266  | N/A             | N/A                                              |
| rs113871181* | LINC02210-CRHR1 | Neuroticism; IQ                                  |
| rs1550435*   | PML             | BMI                                              |
| rs34517439*  | DNAJB4          | BMI                                              |
| rs6775319    | LOC105376976    | Autoimmune                                       |
| rs9293503*   | LINC00461       | Neuroticism; IQ; education                       |

\*Instrument SNPs whose corresponding gene in dbSNP has known associations with depression-relevant traits in the GWAS Catalog as of 9/1/2018, regardless of pleiotropy type



**eTable 8. Mendelian Randomization Results for Sensitivity Analysis**

| Method                    | Odds ratio | 95% CI     | P Value | SNPs |
|---------------------------|------------|------------|---------|------|
| Inverse-variance weighted | 0.63       | 0.45, 0.89 | 0.008   | 4    |
| Weighted median           | 0.65       | 0.43, 0.97 | 0.03    | 4    |
| MR Egger                  | 0.53       | 0.15, 1.82 | 0.42    | 4    |

Odds ratio = odds for MDD per 1 standard deviation increase in average acceleration.

**eFigure 3. Mendelian Randomization Plots for Accelerometer-Based Activity (Sensitivity Analysis) → Depression**

(a) Scatterplot of SNP effects on physical activity (PA) versus their effects on depression (MDD), with slope of line corresponding to the estimated MR effect.

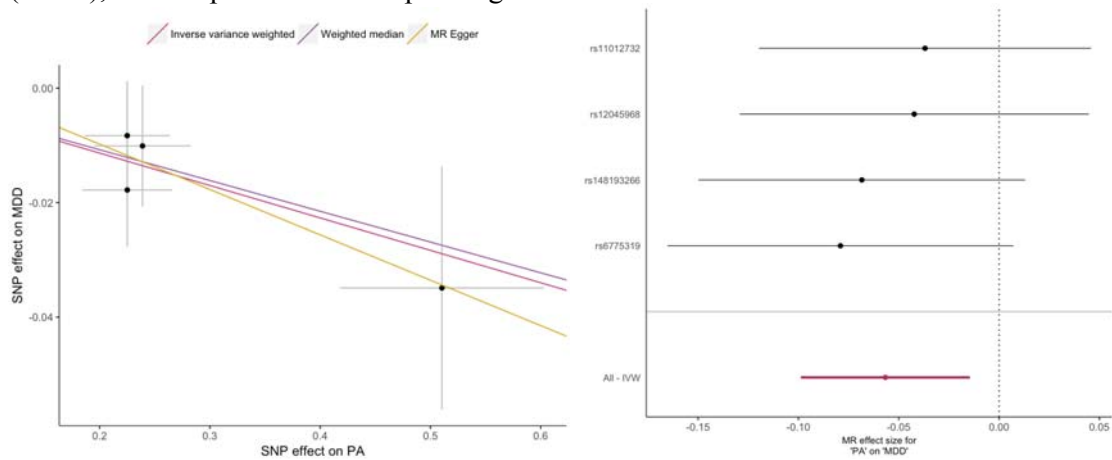

**eTable 9. Mendelian Randomization Results of Self-Reported Activity (Top SNPs  $P < 1 \times 10^{-7}$ ) → Depression**

| Method                                 | Odds ratio | 95% CI      | P Value | SNPs |
|----------------------------------------|------------|-------------|---------|------|
| Inverse-variance weighted <sup>†</sup> | 1.28       | 0.87, 1.90  | .21     | 24   |
| Weighted median <sup>†</sup>           | 1.49       | 0.94, 2.36  | .08     | 24   |
| MR Egger <sup>†</sup>                  | 1.56       | 0.30, 8.03  | .60     | 24   |
| Inverse-variance weighted              | 1.17       | 0.77, 1.78  | .46     | 25   |
| Weighted median                        | 1.44       | 0.90, 2.30  | .13     | 25   |
| MR Egger                               | 1.86       | 0.31, 10.94 | .50     | 25   |

<sup>†</sup>Main model, with MR-PRESSO outlier (rs7326482) removed.

Odds ratio = odds for depressive disorder per 1 standard deviation increase in standardized metabolic-equivalent minutes of moderate-to-vigorous physical activity.

**eFigure 4. Mendelian Randomization Plots for Self-Reported Activity (Top SNPs  $P < 1 \times 10^{-7}$ ) → Depression**

(a) Scatterplot of SNP effects on physical activity (PA) versus their effects on depression (MDD), with slope of each line corresponding to estimated MR effect per method. (b) Forest plot of individual and combined SNP effects.

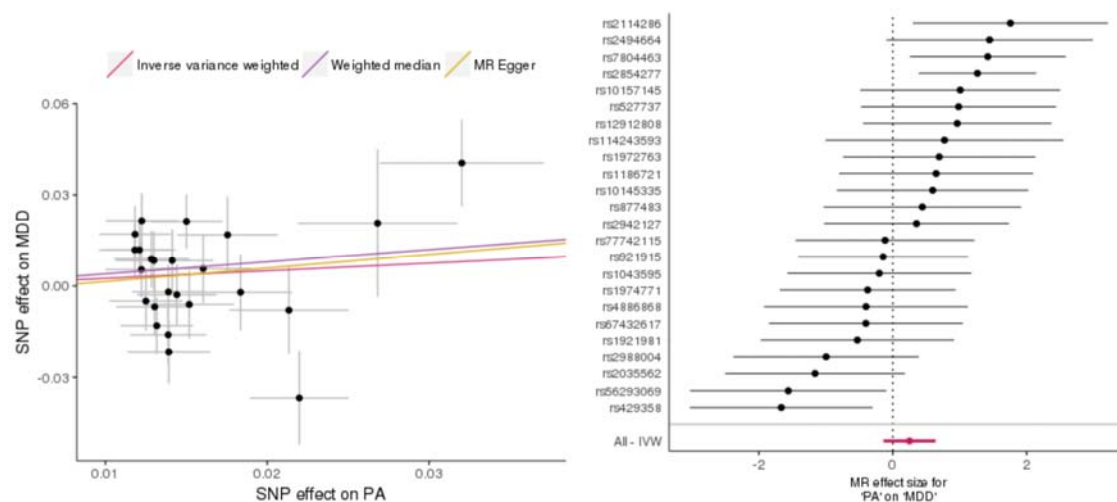

**eTable 10. Mendelian Randomization Results of Self-Reported Activity (Top SNPs  $P < 1 \times 10^{-7}$ ) → Depression, Further Excluding APOE SNP**

| Method                     | Odds ratio | 95% CI      | P Value | SNPs |
|----------------------------|------------|-------------|---------|------|
| Inverse-variance weighted* | 1.40       | 0.96, 2.02  | .08     | 23   |
| Weighted median            | 1.56       | 0.97, 2.48  | .06     | 23   |
| MR Egger                   | 2.67       | 0.56, 12.79 | .23     | 23   |

\*With APOE SNP (rs429358) further removed.

**eTable 11. Mendelian Randomization Results of Self-Reported Activity (Genome-Wide SNPs Only) → Depression**

| Method                                 | Odds ratio | 95% CI       | P Value | SNPs |
|----------------------------------------|------------|--------------|---------|------|
| Inverse-variance weighted <sup>†</sup> | 1.38       | 0.57, 3.37   | .48     | 6    |
| Weighted median <sup>†</sup>           | 1.08       | 0.47, 2.49   | .86     | 6    |
| MR Egger <sup>†</sup>                  | 13.55      | 1.28, 143.74 | .10     | 6    |
| Inverse-variance weighted              | 1.45       | 0.52, 4.04   | .48     | 8    |
| Weighted median                        | 0.95       | 0.39, 2.29   | .91     | 8    |
| MR Egger                               | 8.71       | 0.25, 304.52 | .28     | 8    |

<sup>†</sup>Main model, with MR-PRESSO outliers (rs149943, rs429358) removed.

Odds ratio = odds for depressive disorder per 1 standard deviation increase in standardized metabolic-equivalent minutes of moderate-to-vigorous physical activity.

**eFigure 5. Mendelian Randomization Plots for Self-Reported Activity (Genome-Wide SNPs Only) → Depression**

(a) Scatterplot of SNP effects on physical activity (PA) versus their effects on depression (MDD), with slope of each line corresponding to estimated MR effect per method. (b) Forest plot of individual and combined SNP effects.

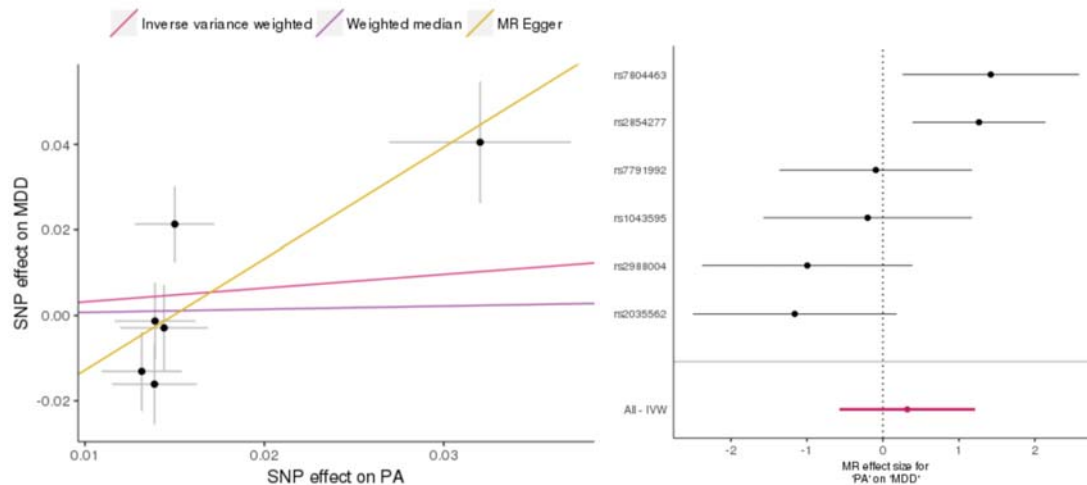

**eTable 12. Mendelian Randomization Results of Depression (Top SNPs  $P < 1 \times 10^{-6}$ ) → Self-Reported Activity**

| Method                                 | Beta  | 95% CI       | P Value | SNPs |
|----------------------------------------|-------|--------------|---------|------|
| Inverse-variance weighted <sup>†</sup> | 0.02  | -0.008, 0.05 | .15     | 14   |
| Weighted median <sup>†</sup>           | 0.02  | -0.02, 0.06  | .32     | 14   |
| MR Egger <sup>†</sup>                  | -0.04 | -0.16, 0.08  | .55     | 14   |
| Inverse-variance weighted              | 0.02  | -0.03, 0.04  | .96     | 16   |
| Weighted median                        | 0.02  | -0.02, 0.06  | .30     | 16   |
| MR Egger                               | 0.05  | -0.17, 0.27  | .65     | 16   |

<sup>†</sup>Main model, with MR-PRESSO outliers (rs1936365, rs12658032) removed.

Beta = change in standardized metabolic-equivalent minutes of moderate-to-vigorous physical activity per depressive disorder caseness.

**eFigure 6. Mendelian Randomization Plots for Depression (Top SNPs  $P < 1 \times 10^{-6}$ ) → Self-Reported Activity**

(a) Scatterplot of SNP effects on depression (MDD) versus their effects on physical activity (PA), with slope of each line corresponding to estimated MR effect per method. (b) Forest plot of individual and combined SNP effects.

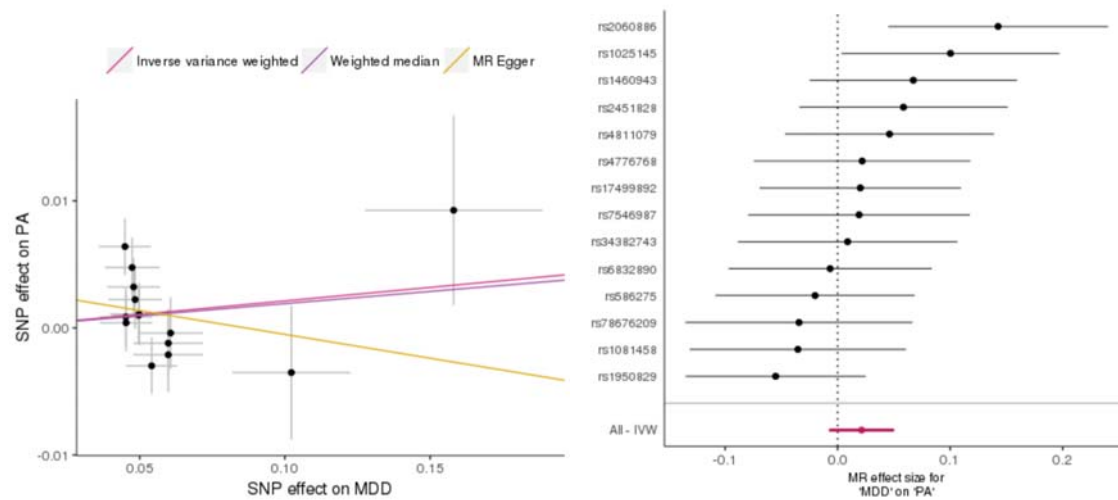

**eFigure 7. Contextualizing 1-SD Increase in Objectively Measured Physical Activity**

Based on different hypothetical patterns of physical activity in a 24-hour period, Persons B, C and D may each show an increase of approximately 8 milligravities of average acceleration compared to Person A (see **Table S8**).

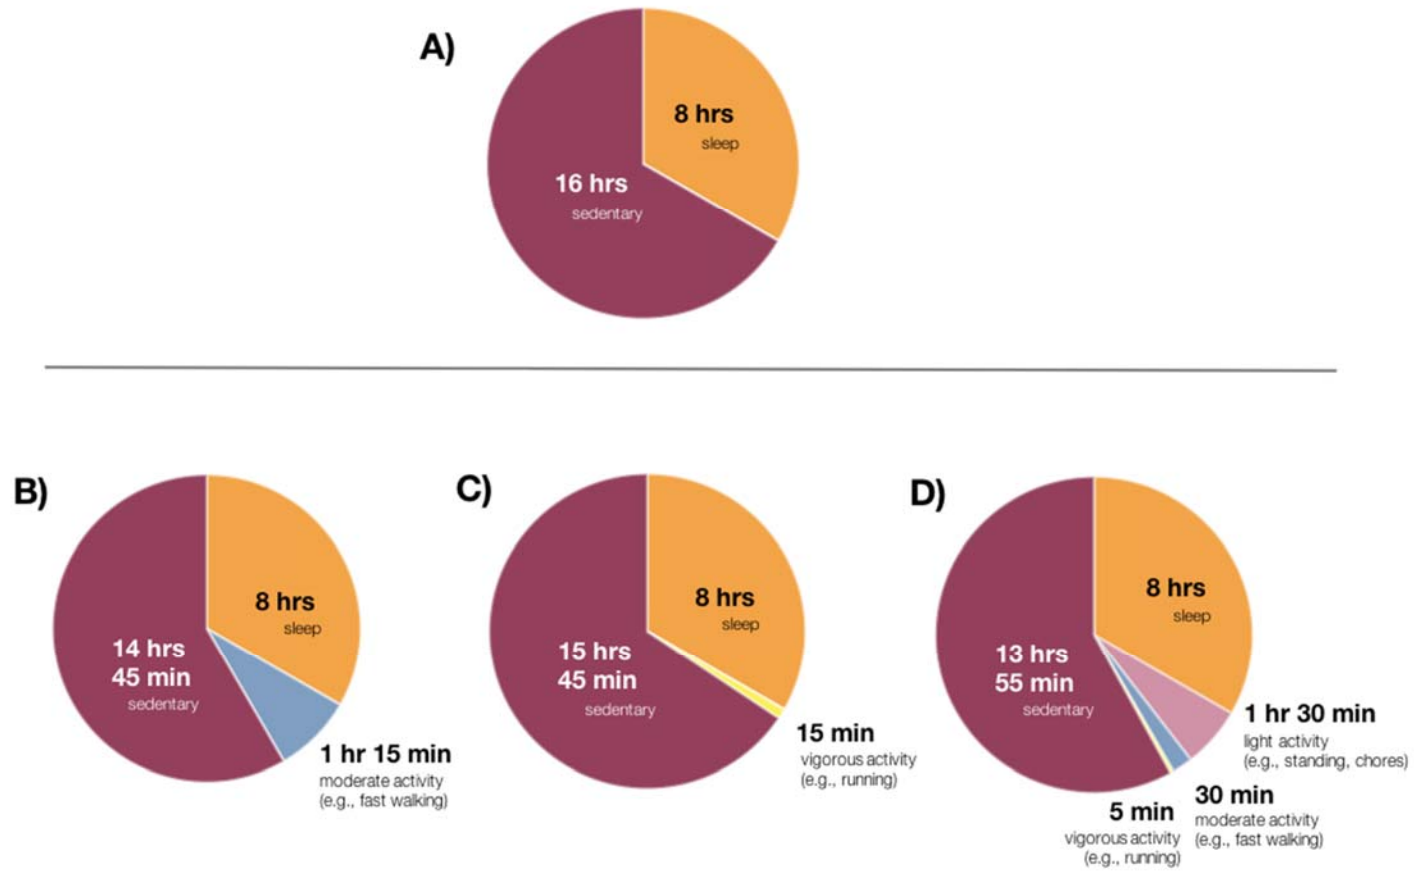

**eTable 13. Contextualizing 1-SD Increase in Objectively Measured Physical Activity**

| Activity             | mg/epoch | # of epochs (hours) |                    |                    |               |
|----------------------|----------|---------------------|--------------------|--------------------|---------------|
|                      |          | A) “Sedentary only” | B) “Moderate only” | C) “Vigorous only” | D) “Mixed”    |
| Sleep                | 7        | 5760 (8)            | 5760 (8)           | 5760 (8)           | 5760 (8)      |
| Light activity       | 65       | 0                   | 0                  | 0                  | 1080 (1.5)    |
| Moderate activity    | 180      | 0                   | 900 (1.25)         | 0                  | 360 (0.5)     |
| Vigorous activity    | 750      | 0                   | 0                  | 180 (0.25)         | 60 (0.083)    |
| Sedentary behavior   | 25       | 11520 (16)          | 10620 (14.75)      | 11340 (15.75)      | 10020 (13.92) |
| Total mg             |          | 328320              | 467820             | 458820             | 470820        |
| Average acceleration |          | 19                  | 27.1               | 26.6               | 27.2          |
| Difference from A)   |          |                     | <b>8.1</b>         | <b>7.6</b>         | <b>8.2</b>    |

Based on different hypothetical patterns of physical activity in a 24-hour period, Persons B, C and D may each show an increase of approximately 8 milligravities of average acceleration compared to Person A (see eFigure 7).

*mg* = milligravities; *epoch* = 5-second window of accelerometer data. *mg/epoch* values for illustrative purposes are based on plausible ranges from the literature.<sup>1-3</sup> *Total mg* = # of epochs x estimated *mg/epoch* per activity, summed across activities per person. *Average acceleration* = total *mg* divided by the number of possible 5-second epochs in 24 hours, i.e., 17,280.

## References

1. Bakrania K, Yates T, Rowlands AV, et al. Intensity Thresholds on Raw Acceleration Data: Euclidean Norm Minus One (ENMO) and Mean Amplitude Deviation (MAD) Approaches. *PLoS ONE*. 2016;11(10):e0164045. doi:10.1371/journal.pone.0164045
2. Hildebrand M, VAN Hees VT, Hansen BH, Ekelund U. Age group comparability of raw accelerometer output from wrist- and hip-worn monitors. *Med Sci Sports Exerc*. 2014;46(9):1816-1824. doi:10.1249/MSS.0000000000000289
3. Menai M, van Hees VT, Elbaz A, Kivimaki M, Singh-Manoux A, Sabia S. Accelerometer assessed moderate-to-vigorous physical activity and successful ageing: results from the Whitehall II study. *Sci Rep*. 2017;8:45772. doi:10.1038/srep45772

## eMethods 2. MR Power Calculations

We estimated statistical power for our MR analyses at a standard alpha level of 0.05, using an online calculator based on the Burgess (2014) approach to MR power calculations<sup>4</sup> for binary and continuous outcomes (<https://sb452.shinyapps.io/power>). Statistical power for MR given a specific (outcome) sample size relies on several parameters<sup>2</sup>, including the proportion of variance ( $R^2$ ) in the exposure explained by genetic instruments; the “true” causal effect of the exposure on the outcome, which can be projected across plausible values to investigate impact on statistical power; and the ratio of cases to controls (for binary outcomes).  $R^2$  estimates were obtained as part of the MR Steiger directionality test<sup>6</sup> implemented in the *TwoSampleMR* package, which computes variance explained by the genetic instruments.

**Physical activity (accelerometer-based) → MDD (binary).** Using the MDD GWAS sample size ( $N = 143,265$ ) and ratio of cases to control (1 to 2.14), and an estimated  $R^2$  of 0.004 for 10 genetic instruments on accelerometer-based physical activity, we calculated sufficient power (>80%) to detect effects of physical activity on MDD if the true causal effect of physical activity on MDD had an OR of 0.77 or less. We had 89% power to detect a causal OR of 0.75.

**MDD → physical activity (accelerometer-based; continuous).** Using the accelerometer-based activity GWAS sample size ( $N = 91,084$ ) and an estimated  $R^2$  of 0.003 for 16 genetic instruments on MDD, we calculated sufficient (>80%) power to detect effects of MDD on accelerometer-based activity if the true causal effect was a decreasing effect of 0.17 standardized units of accelerometer-based activity per 1 SD change in MDD.

**Physical activity (self-reported) → MDD (binary).** Using the MDD GWAS sample size ( $N = 143,265$ ) and ratio of cases to control (1 to 2.14), and an estimated  $R^2$  of 0.002 for 24 genetic instruments on self-reported physical activity, we calculated sufficient power

(>80%) to detect effects of physical activity on MDD if the true causal effect of self-reported physical activity on MDD had an OR of less than 0.70. **MDD → physical activity (self-reported; continuous)**. Using the self-reported activity GWAS sample size (N = 377,234) and an estimated  $R^2$  of 0.003 for 16 genetic instruments on MDD, we calculated sufficient (>80%) power to detect effects of MDD on self-reported activity if the true causal effect was a decreasing effect of 0.09 standardized units of self-reported activity per 1 SD change in MDD.

### References

4. Burgess S. Sample size and power calculations in Mendelian randomization with a single instrumental variable and a binary outcome. *International Journal of Epidemiology*. 2014;43(3):922-929. doi:10.1093/ije/dyu005
5. Brion M-JA, Shakhbazov K, Visscher PM. Calculating statistical power in Mendelian randomization studies. *International Journal of Epidemiology*. 2013;42(5):1497-1501. doi:10.1093/ije/dyt179
6. Hemani G, Tilling K, Davey Smith G. Orienting the causal relationship between imprecisely measured traits using GWAS summary data. *PLoS Genet*. 2017;13(11):e1007081. doi:10.1371/journal.pgen.1007081
